# Supplementary material
Source: Springer Nature journal article supplement (https://www.springermedizin.de/resource/supplementary/12889_2011_3301_MOESM8_ESM.pdf/9488644)

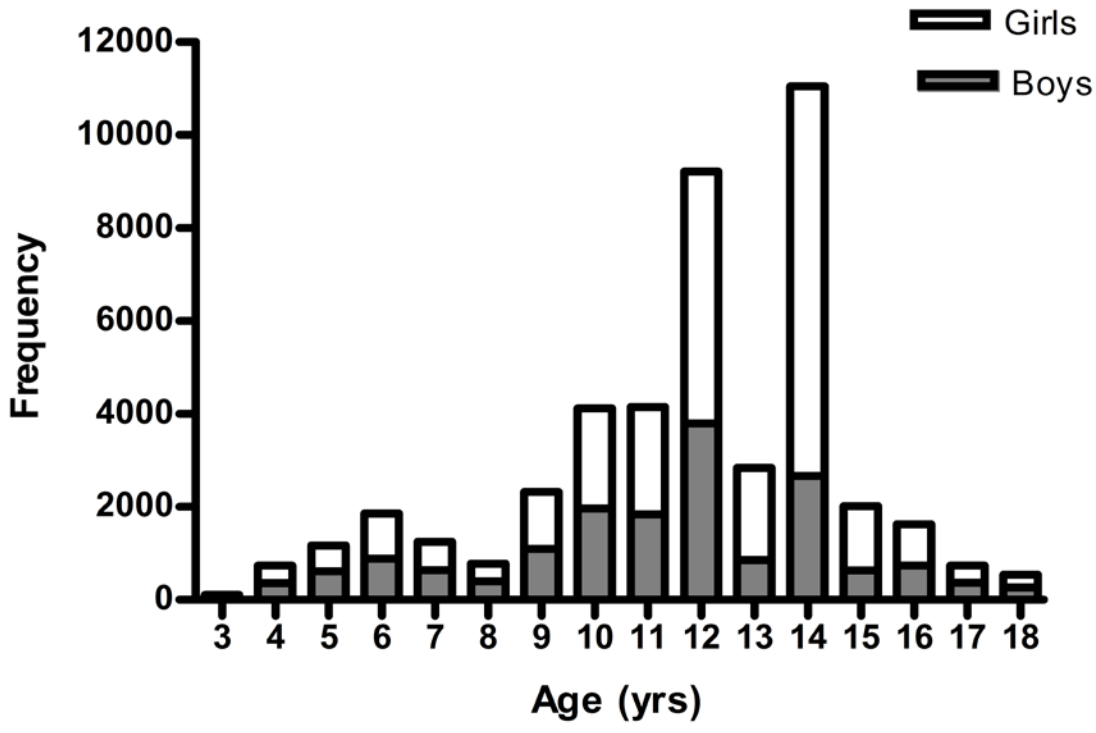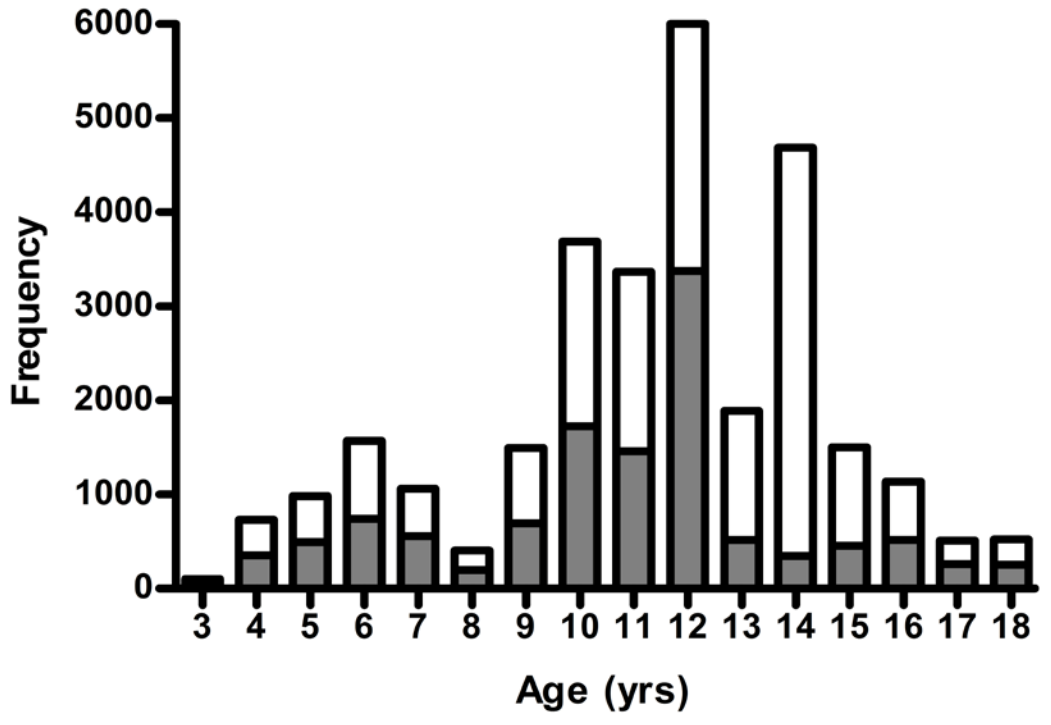

Supplement: MOESM8 [file 9488644]
